# Supplementary material for: Micro-kinetic model of electrochemical carbon dioxide reduction over platinum in non-aqueous solvents
Source: Royal Society of Chemistry journal article supplement (doi:10.1039/c9cp05751j), 2020-01-01
Supplement: c9cp05751j1.pdf [file c9cp05751j1.pdf]

## Supplementary Information for: Micro-Kinetic Model of Electrochemical Carbon Dioxide Reduction over Platinum in Non-Aqueous Solvents

Brian A. Rohr,<sup>a</sup> Aayush R. Singh,<sup>a</sup> Joseph A. Gauthier,<sup>a</sup> Michael J. Statt,<sup>a</sup> and Jens K. Nørskov<sup>b,\*</sup>

### 1 Details of Implicit Solvation Model for Potential Dependence of CO<sub>2</sub> Adsorption

To determine the potential dependence of CO<sub>2</sub> adsorption, grand-canonical constant potential calculations were performed. The Vienna Ab-Initio Simulation Package<sup>1-3</sup> was used, with the electrolyte modeled by the polarizable continuum model as implemented in VASPsol.<sup>4,5</sup> The counter-charge was modeled with the linearized Poisson-Boltzmann equation with a Debye screening length of 3 Å, corresponding to 1.0M electrolyte. Further details of the polarizable continuum can be found in its documentation.<sup>4,5</sup> To counteract the substantial dipole moment of adsorbed CO<sub>2</sub> (which adopts a bent configuration), charge and countercharge is introduced to obtain constant potential energetics. The potential dependence of CO<sub>2</sub> adsorption depends proportionally to the strength of this dipole moment, which is largely independent of the metal it binds to and rather depends on the configuration of the CO<sub>2</sub> molecule. On Pt (111), this potential dependence was calculated to be 0.2 eV of stabilization per Volt of potential, with CO<sub>2</sub> being stabilized by more reducing potentials.

---

<sup>a</sup> Stanford University, Stanford, CA, USA

<sup>b</sup> Department of Physics, Technical University of Denmark

\* Corresponding Author; jkno.dtu.dk

## 2 Coverage Heatmaps

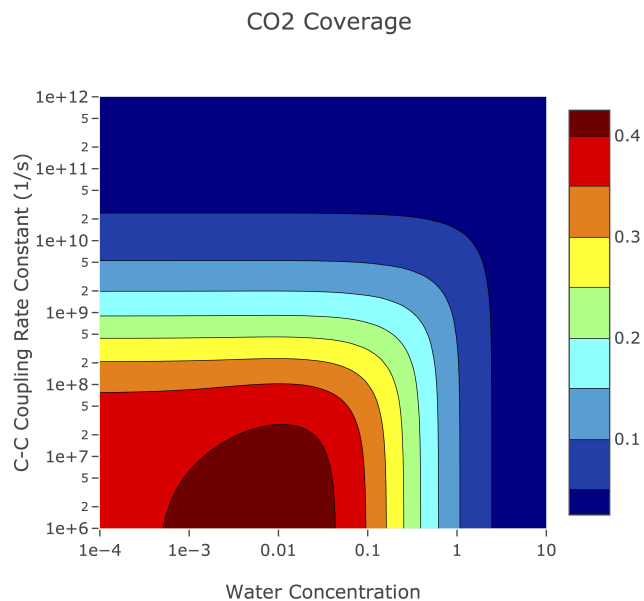

**Fig. 1** Model I's estimate of the coverage of surface-bound carbon dioxide as a function of water concentration and the C-C coupling rate constant.

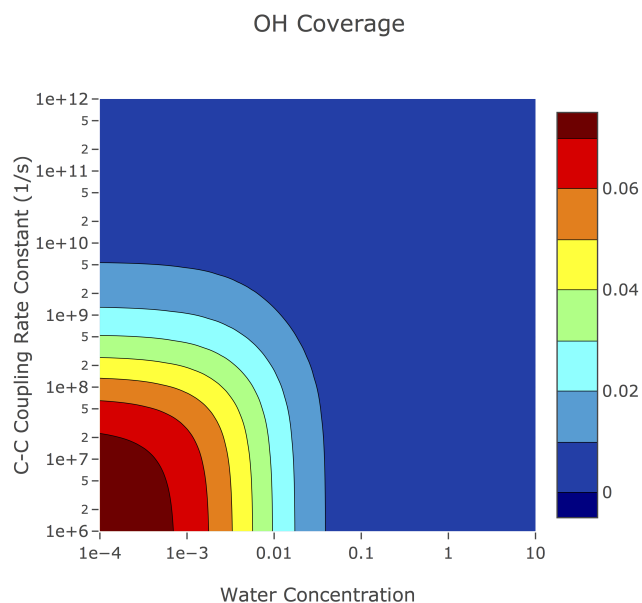

**Fig. 3** Model I's estimate of the coverage of surface-bound OH as a function of water concentration and the C-C coupling rate constant.

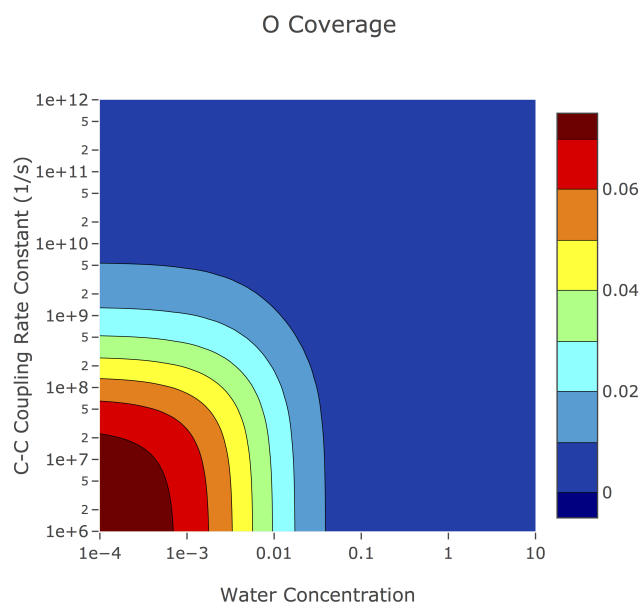

**Fig. 2** Model I's estimate of the coverage of surface-bound oxygen as a function of water concentration and the C-C coupling rate constant.

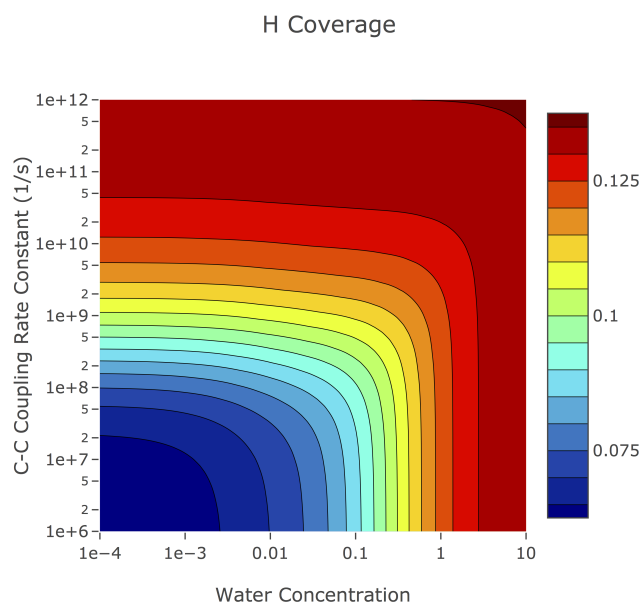

**Fig. 4** Model I's estimate of the coverage of surface-bound hydrogen as a function of water concentration and the C-C coupling rate constant.

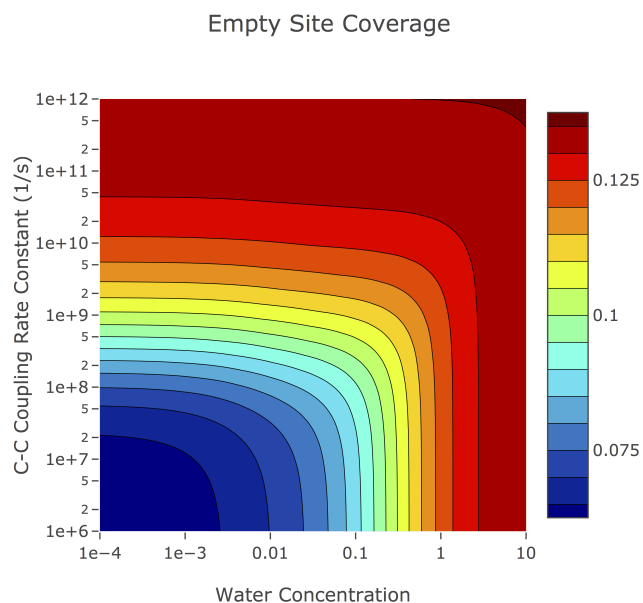

**Fig. 5** Model I's estimate of the coverage of empty sites as a function of water concentration and the C-C coupling rate constant.

## Notes and references

- 1 G. Kresse and J. Furthmüller, *Physical Review B*, 1996, **54**, 11169–11186.
- 2 G. Kresse and J. Furthmüller, *Computational Materials Science*, 1996, **6**, 15–50.
- 3 G. Kresse and J. Hafner, *Physical Review B*, 1993, **47**, 558–561.
- 4 K. Mathew, R. Sundararaman, K. Letchworth-Weaver, T. Arias and R. G. Hennig, *The Journal of Chemical Physics*, 2014, **140**, 084106.
- 5 K. Mathew and R. G. Hennig, *arXiv preprint arXiv:1601.03346*, 2016.
